# Supplementary material for: Sidewall functionalization of single-walled carbon nanotubes through electrophilic additionElectronic supplementary information (ESI) available: Fig. S1: TEM views of functionalized nanotubes 1. Fig. S2: 1H NMR spectrum of functionalized SWNTs 2 material. See http://www.rsc.org/suppdata/cc/b2/b204366a/
Source: Royal Society of Chemistry journal article supplement (doi:10.1039/b204366a), 2002-08-12
Supplement: b204366a1.doc [file b204366a1.doc]

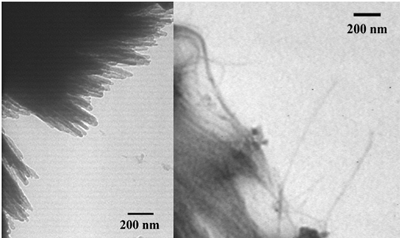


Figure S1: TEM views of functionalized nanotubes **1**, aggregated in thick bundles (left side image)

and less aggregated ones (right side image)
