# Supplementary figures and images for: Sidewall functionalization of single-walled carbon nanotubes through electrophilic additionElectronic supplementary information (ESI) available: Fig. S1: TEM views of functionalized nanotubes 1. Fig. S2: 1H NMR spectrum of functionalized SWNTs 2 material. See http://www.rsc.org/suppdata/cc/b2/b204366a/
Source: Royal Society of Chemistry journal article supplement (doi:10.1039/b204366a), 2002-08-12

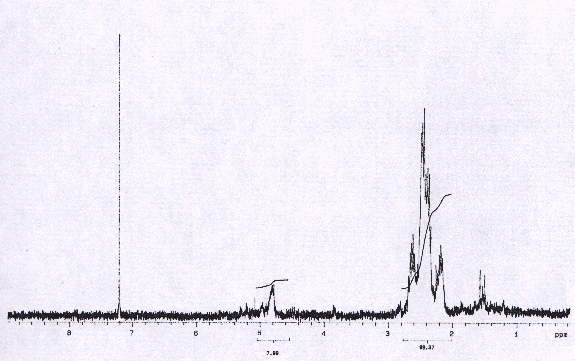


Figure S2: 1H NMR spectrum of functionalized SWNTs **2** material.

Supplement: b204366a2.doc [file b204366a2.doc]
